# Supplementary material for: Cav1/EREG/YAP Axis in the Treatment Resistance of Cav1-Expressing Head and Neck Squamous Cell Carcinoma
Source: Cancers (Basel). 2021 Jun 18;13(12):3038. doi: 10.3390/cancers13123038 (PMC8235528; doi:10.3390/cancers13123038)

# Supplementary Materials: Cav1/EREG/YAP Axis in the Treatment Resistance of Cav1-Expressing Head and Neck Squamous Cell Carcinoma

Mickaël Burgy, Aude Jehl, Omblin Conrad, Sophie Foppolo, Véronique Bruban, Nelly Etienne-Selloum, Alain C Jung, Murielle Masson, Christine Macabre Sonia Ledrappier, Hélène Burckel, Carole Mura, Georges Noël, Christian Borel, François Fasquelle, Mihaela-Alina Onea, Marie-Pierre Chenard, Alicia Thiéry, Monique Dontenwill and Sophie Martin

**Table S1.** Antibodies.

| Antibodies                                 | Species | Dilution | Suppliers                  |
|--------------------------------------------|---------|----------|----------------------------|
| Caveolin-1 (N-20, sc-894)                  | Rabbit  | 1:1000   | Santa Cruz Biotechnology   |
| GAPDH (MAB374)                             | Mouse   | 1:10000  |                            |
| Cleaved PARP (#9541, Asp214)               | Rabbit  | 1:1000   | EMD Millipore®             |
| TAZ (D3I6D)                                | Rabbit  | 1:1000   |                            |
| YAP (14074S)                               | Rabbit  | 1:1000   | Cell Signaling Technology® |
| pYAP S127 (D9W2I)                          | Rabbit  | 1:1000   |                            |
| EGFR (D1D4J) XP®                           | Rabbit  | 1:1000   |                            |
| p44/42 MAPK (#9102)                        | Rabbit  | 1:1000   |                            |
| Phospho-p44/42 MAPK (#9101, Thr202/Tyr204) | Rabbit  | 1:1000   |                            |
| AKT (#9272)                                | Rabbit  | 1:1000   |                            |
| Phospho-AKT (#4060, D9E, Ser473)           | Rabbit  | 1:1000   |                            |
| Anti-mouse IgG HRP-conjugate               | Goat    | 1:10000  | Promega®                   |
| Anti-rabbit IgG HRP-conjugate              |         |          |                            |

Supplementary data 1

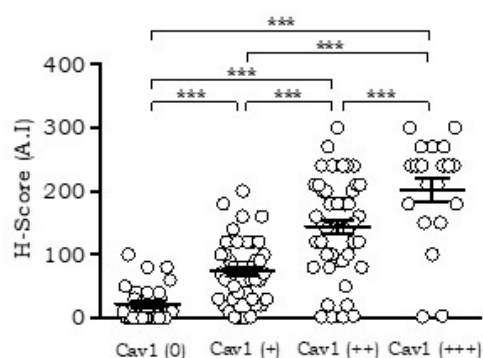

Supplementary data 2

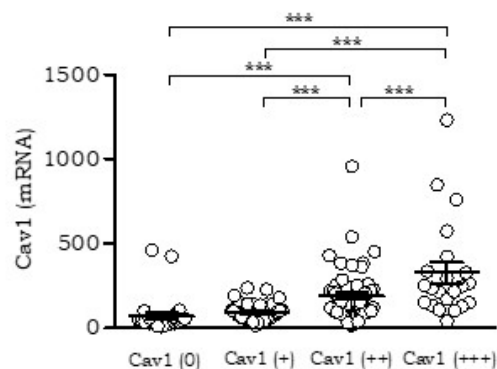

Supplementary data 3

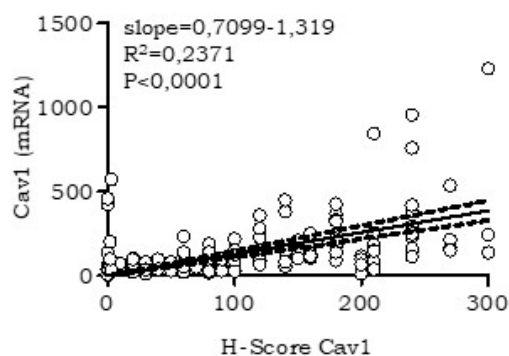

**Data S1–S3:** Cav1 expression in human HNSCC primary tumor tissues 1, The H-score was calculated as a percentage of cells stained for Cav1 (0, 1, 2 or 3) using the formula  $(1 \times (\% \text{ cells } 1) + 2 \times (\% \text{ cells } 2) + 3 \times (\% \text{ cells } 3))$ . Histograms show the Cav1 H-score in each subgroup identified by IHC. 2, Histograms show the mRNA expression level of Cav1 in each subgroup identified by IHC. 3, Correlation curve between the mRNA expression level of Cav1 and the Cav1 H-score. Each bar represents the mean  $\pm$  SEM with \*\*\* $p < 0.001$ .

Original western blots:

**Original blot (overlay PM marker+image) - FIGURE 1B**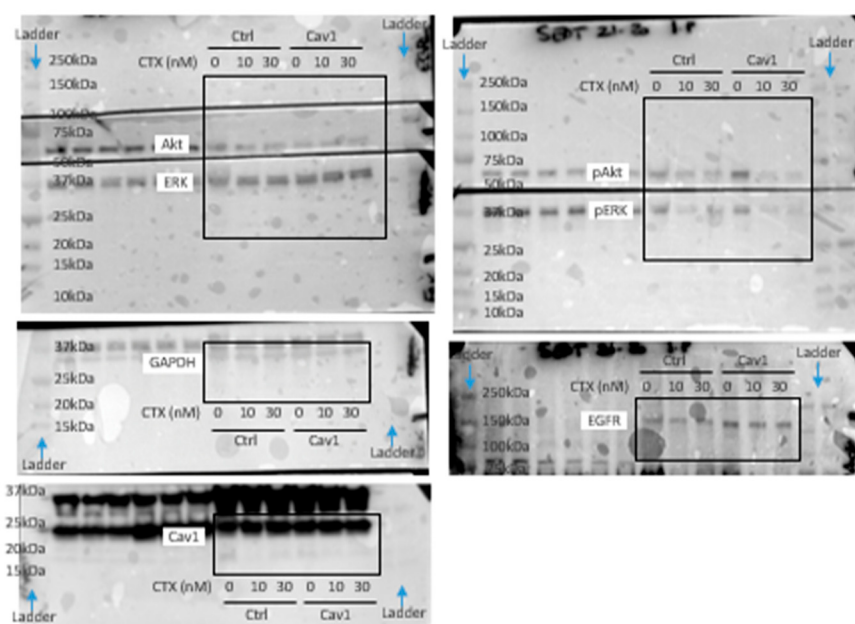**Original blot (overlay PM marker+image) - FIGURE 2E**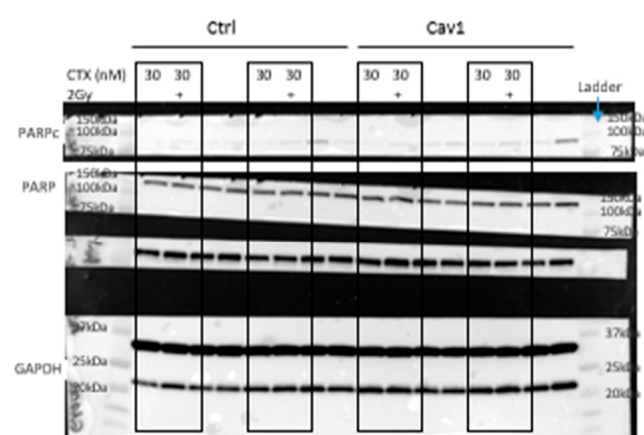

Original blot (overlay PM marker+image) - FIGURE 4B (GAPDH)

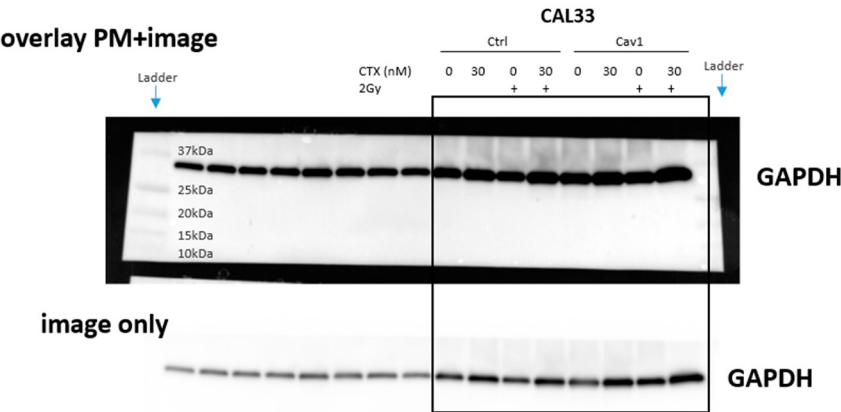

Original blot (overlay PM marker+image) - FIGURE 5A

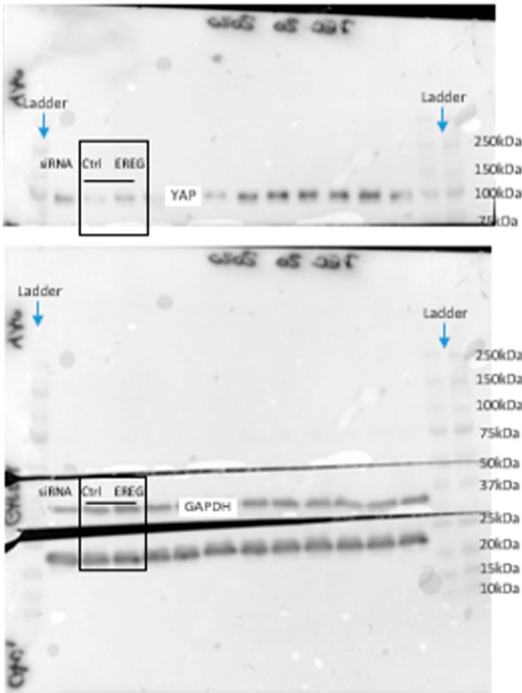

Original blot (overlay PM marker+image) - FIGURE 5B

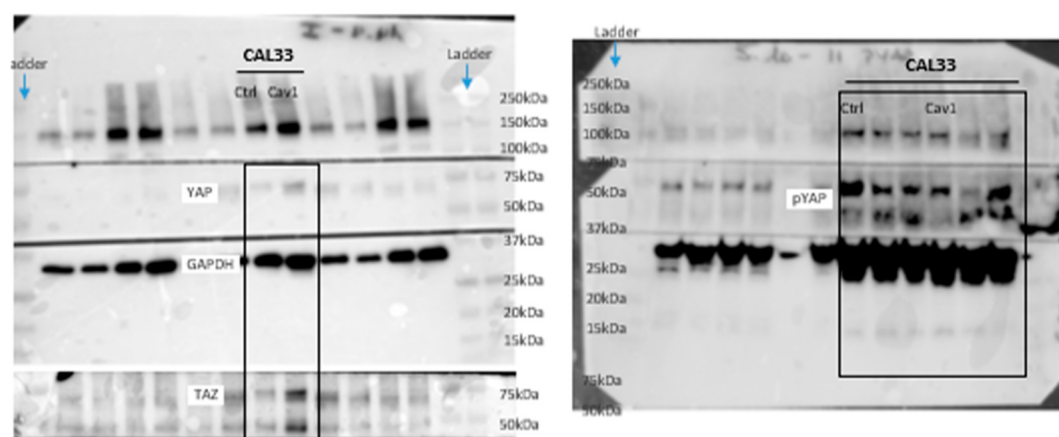

Original blot (overlay PM marker+image) - FIGURE 5D

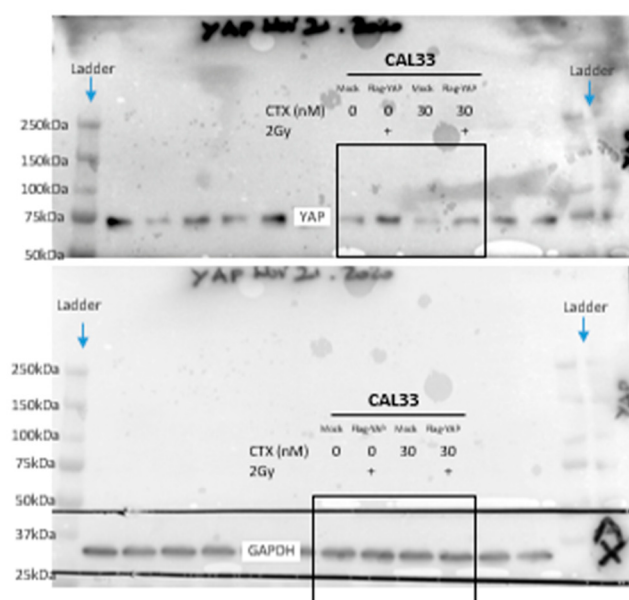

Supplement: Supplementary file 1 [file cancers-13-03038-s001.zip › cancers-1227836-supplementary conversion.pdf]
