# Supplementary material for: Cav1/EREG/YAP Axis in the Treatment Resistance of Cav1-Expressing Head and Neck Squamous Cell Carcinoma
Source: Cancers (Basel). 2021 Jun 18;13(12):3038. doi: 10.3390/cancers13123038 (PMC8235528; doi:10.3390/cancers13123038)
Supplement: Supplementary file 1 [file cancers-13-03038-s001.zip › cancers-1227836-supplementary table S2 conversion.xlsx]

## Sheet: Cancers-1227836 S2
	Supplementary Table 2: Relation between Caveolin-1 expression and clinical characteristics of patients
	Variable			All patients		Caveolin-1				p-value
						0	+	++	+++
	Sex — no. (%)
	Male			148 (85)		30 (88)	41 (79)	52 (88)	24 (86)	0.55
	Female			26 (15)		4 (12)	11 (21)	7 (11)	4 (14)
	Age
	Median age ―yr			58		62	61	56	60	0.25
	<65yr — no. (%)			118 (68)		20 (59)	33 (63)	45 (76)	20 (71)	0.28
	≥65yr — no. (%)			55 (32)		14 (41)	19 (37)	14 (24)	8 (29)
	ECOG — no. (%)
	0-1			145 (84)		29 (85)	45 (87)	48 (82)	23 (82)	0.4
	2			17 (10)		1 (3)	5 (9)	6 (10)	5 (18)
	≥3			7 (4)		3 (9)	2 (4)	2 (3)	0
	missing			4 (2)		1 (3)	0	3 (5)	0
	Karnofsky score
	Median score			90		90	90	90	90	0.58
	Interquartile range			90-100
	<80yr — no. (%)			22 (13)		4 (12)	6 (12)	7 (12)	5 (18)	0.88
	≥80yr — no. (%)			145 (84)		29 (86)	46 (88)	47 (80)	23 (82)
	missing			6 (3)		1 (2)	0	5 (8)	0
	Charlson Comorbidity Index — no. (%)
	Median score			4		4	4	3	4	0.22
	0			0		0	0	0	0
	1-2			21 (12)		4 (12)	3 (6)	10 (17)	4 (14)	0.62
	3-4			86 (50)		18 (53)	27 (52)	28 (47)	13 (47)
	≥5			61 (35)		11 (32)	22 (42)	18 (31)	10 (35)
	missing			5 (3)		1 (3)	0	3 (5)	1 (4)
	Smoking — no. (%)
	smoking cessation			69 (40)		21 (62)	21 (40)	15 (25)	12 (43)	0.06
	active smoking			89 (51)		12 (35)	27 (52)	35 (60)	15 (54)
	pack-years means			40		46	44	41	49	0.74
	no history of smoking			8 (5)		1 (3)	3 (6)	4 (7)	0
	missing			7 (4)		0	1 (2)	5 (8)	1 (3)
	Alcohol consumption — no. (%)
	history of alcohol addiction			112 (65)		23 (68)	36 (69)	32 (54)	21 (75)	0.44
	missing			8 (5)		1 (3)	1 (2)	4 (7)	2 (7)
	Primary tumor site — no. (%)
	Oral cavity			36 (21)		3 (9)	9 (17)	18 (31)	6 (21)	0.12
	Oropharynx			52 (30)		14 (41)	12 (23)	16 (27)	10 (36)
	Hypopharynx			44 (25)		12 (35)	16 (31)	12 (20)	4 (14)
	Overlap between several tumor sites			41 (24)		5 (15)	15 (29)	13 (22)	8 (29)
	TNM classification — no. (%)
	T	T1		9 (5)		1 (3)	2 (4)	4 (7)	2 (7)	0.18
		T2		55 (32)		13 (38)	15 (29)	24 (41)	3 (11)
		T3		73 (43)		15 (44)	24 (46)	17 (29)	17 (61)
		T4		36 (20)		5 (15)	11 (21)	14 (23)	6 (21)
	N	N0		24 (14)		2 (6)	8 (15)	9 (15)	5 (18)	0.43
		N1		17 (10)		5 (15)	6 (12)	4 (7)	2 (7)
		N2a		11 (6)		1 (3)	7 (13)	2 (3)	1 (3)
		N2b		61(36)		13 (38)	14 (27)	27 (46)	7 (25)
		N2c		42 (24)		9 (26)	12 (23)	13 (22)	8 (29)
		N3		18 (10)		4 (12)	5 (10)	4 (7)	5 (18)
	Histologic type and characteristics — no. (%)
	Well differentiated			29 (17)		1 (3)	10 (19)	10 (17)	8 (29)	0.06
	Modertely differentiated			93 (54)		17 (50)	28 (54)	34 (58)	14 (50)
	Poorly differentiated			42 (24)		14 (41)	11 (21)	11 (19)	6 (21)
	Indifferentiated			4 (2)		1 (3)	1 (2)	2 (3)	0
	Squamous-cell carcinoma not specified			5 (3)		1 (3)	2 (4)	2 (3)	0
	Lymphovascular emboli			38		10 (29)	11 (21)	11 (19)	6 (21)	0.63
	Perineural invasion			20		2 (6)	8 (15)	4 (7)	6 (21)	0.17
	Capsular rupture of the lymph nodes			116		27 (79)	34 (65)	37 (63)	18 (64)	0.39
	Positive surgical margins			73		16 (47)	23 (44)	24 (41)	10 (36)	0.88
	First-line treatment — no. (%)
	Adjuvant radiotherapy alone			63 (37)		10 (29)	23 (44)	18 (31)	12 (43)	0.32
	Concomitant chemotherapy (cisplatin)			106 (61)		24 (71)	29 (56)	38 (64)	15 (54)
	Without adjuvant therapy			4 (2)				3 (5)	1 (3)
	Extent of disease — no. (%)
	Only locoregionally recurrent			37 (21)		5 (15)	6 (12)	12 (20)	14 (50)	0.004
	Metastatic with or without locoregional recurrence			43 (25)		11 (32)	15 (29)	14 (24)	3 (11)	0.8
	Total — no. (%)			173		34 (20)	52 (30)	59 (34)	28 (16)
